# Supplementary material for: A solid-state Matryoshka doll-like microwave method for one-step rapid synthesis of composites of NiSe2 and nitrogen-doped porous carbon for sodium storage
Source: Royal Society of Chemistry journal article supplement (doi:10.1039/d2tc04099a), 2022-01-01
Supplement: d2tc04099a1.pdf [file d2tc04099a1.pdf]

## Supporting Information

**A solid-state Matryoshka doll-like microwave method for one-step rapid synthesis of composites of NiSe<sub>2</sub> and nitrogen-doped porous carbon for sodium storage**

Yayun Zheng, Xirui Kong, Lang He, Yi Song\*, Yan Zhao\*

*The Institute of Technological Sciences, Wuhan University, Wuhan 430072, People's Republic of China.*

\*Correspondence to: [yi.song@whu.edu.cn](mailto:yi.song@whu.edu.cn) (Yi Song); [yan2000@whut.edu.cn](mailto:yan2000@whut.edu.cn) (Yan Zhao)

## Table of Contents

|                                                                                                                                                                                                                                             |    |
|---------------------------------------------------------------------------------------------------------------------------------------------------------------------------------------------------------------------------------------------|----|
| <b>Figure S1.</b> Raman patterns of samples with different mass ratios of Ni/Se: NiSe <sub>2</sub> /Ni <sub>3</sub> Se <sub>4</sub> /N-C, Ni <sub>3</sub> Se <sub>4</sub> /NiSe <sub>2</sub> /N-C and Ni <sub>3</sub> Se <sub>4</sub> /N-C. | 3  |
| <b>Figure S2.</b> Raman patterns of samples with different microwave time: NiSe <sub>2</sub> /N-C-10 and NiSe <sub>2</sub> /N-C-30.                                                                                                         | 4  |
| <b>Figure S3.</b> SEM images of samples with different time, a-b) NiSe <sub>2</sub> /N-C-10 and c-d) NiSe <sub>2</sub> /N-C-30.                                                                                                             | 5  |
| <b>Figure S4.</b> SEM images of samples with different mass ratios, a) NiSe <sub>2</sub> /Ni <sub>3</sub> Se <sub>4</sub> /N-C, b) Ni <sub>3</sub> Se <sub>4</sub> /NiSe <sub>2</sub> /N-C and c) Ni <sub>3</sub> Se <sub>4</sub> /N-C.     | 6  |
| <b>Figure S5.</b> Elemental mapping images of NiSe <sub>2</sub> /N-C.                                                                                                                                                                       | 7  |
| <b>Figure S6.</b> EDS of NiSe <sub>2</sub> /N-C.                                                                                                                                                                                            | 8  |
| <b>Figure S7.</b> The N <sub>2</sub> adsorption-desorption isotherms.                                                                                                                                                                       | 9  |
| <b>Figure S8.</b> the cycling performance of NiSe <sub>2</sub> /N-C at 2 A g <sup>-1</sup> .                                                                                                                                                | 10 |
| <b>Figure S9.</b> a) CV curves at different scan rates. b) The linear relationship of log( <i>v</i> ) and log( <i>i</i> ).                                                                                                                  | 11 |
| <b>Figure S10.</b> The mechanism of sodium storage behavior.                                                                                                                                                                                | 12 |
| <b>Figure S11.</b> SEM images of the cycled NiSe <sub>2</sub> /N-C electrode.                                                                                                                                                               | 13 |
| <b>Table S1.</b> R <sub>s</sub> (Ω), R <sub>1</sub> (Ω), W (Ω) and R <sub>1</sub> (Ω) of NiSe <sub>2</sub> /N-C electrode.                                                                                                                  | 14 |
| <b>Table S2.</b> DFT calculation results of adsorption energies.                                                                                                                                                                            | 15 |

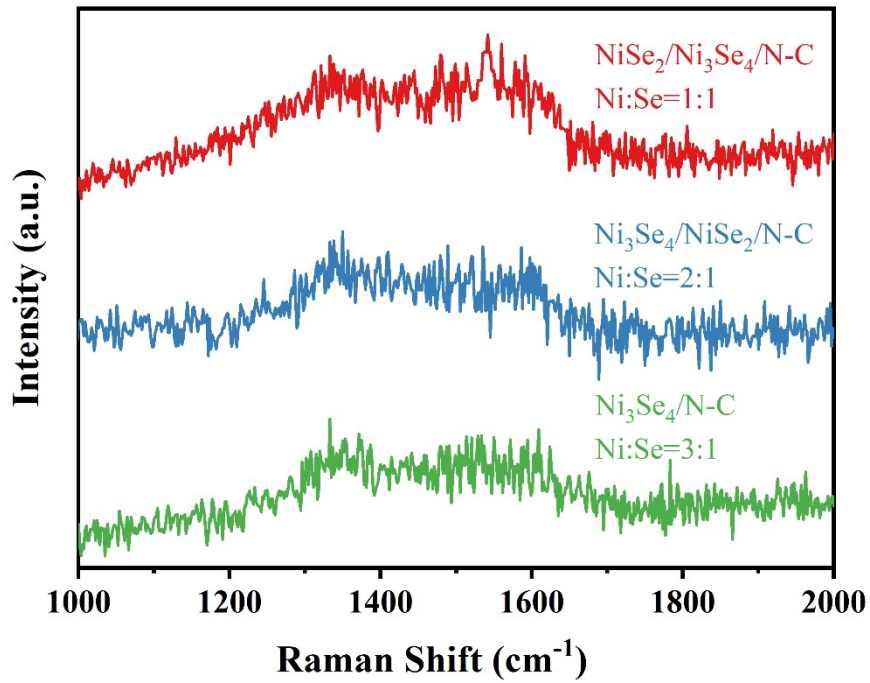

**Figure S1.** Raman patterns of samples with different mass ratios of Ni/Se: NiSe<sub>2</sub>/Ni<sub>3</sub>Se<sub>4</sub>/N-C, Ni<sub>3</sub>Se<sub>4</sub>/NiSe<sub>2</sub>/N-C and Ni<sub>3</sub>Se<sub>4</sub>/N-C.

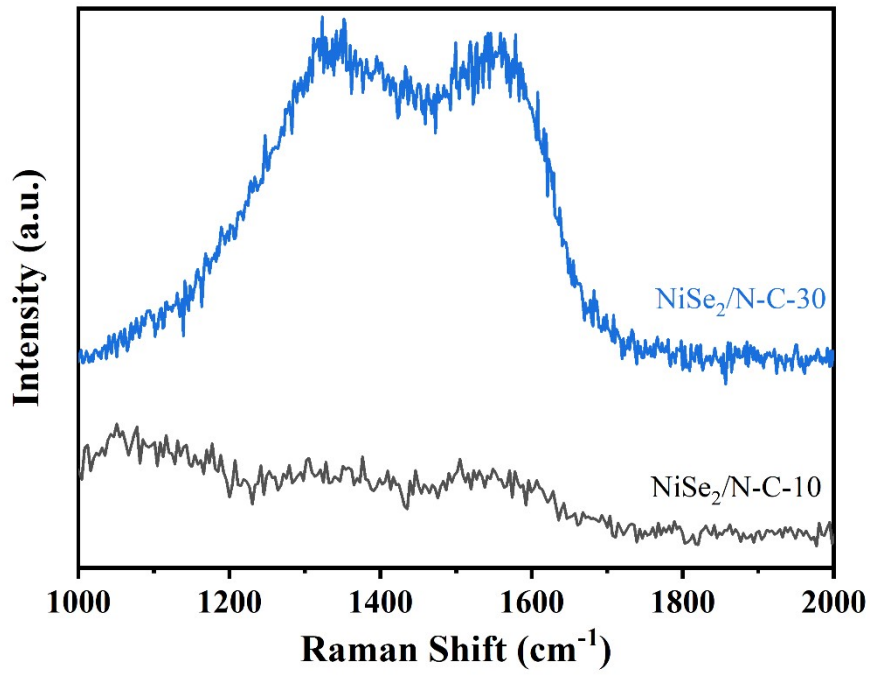

**Figure S2.** Raman patterns of samples with different microwave time: NiSe<sub>2</sub>/N-C-10 and NiSe<sub>2</sub>/N-C-30.

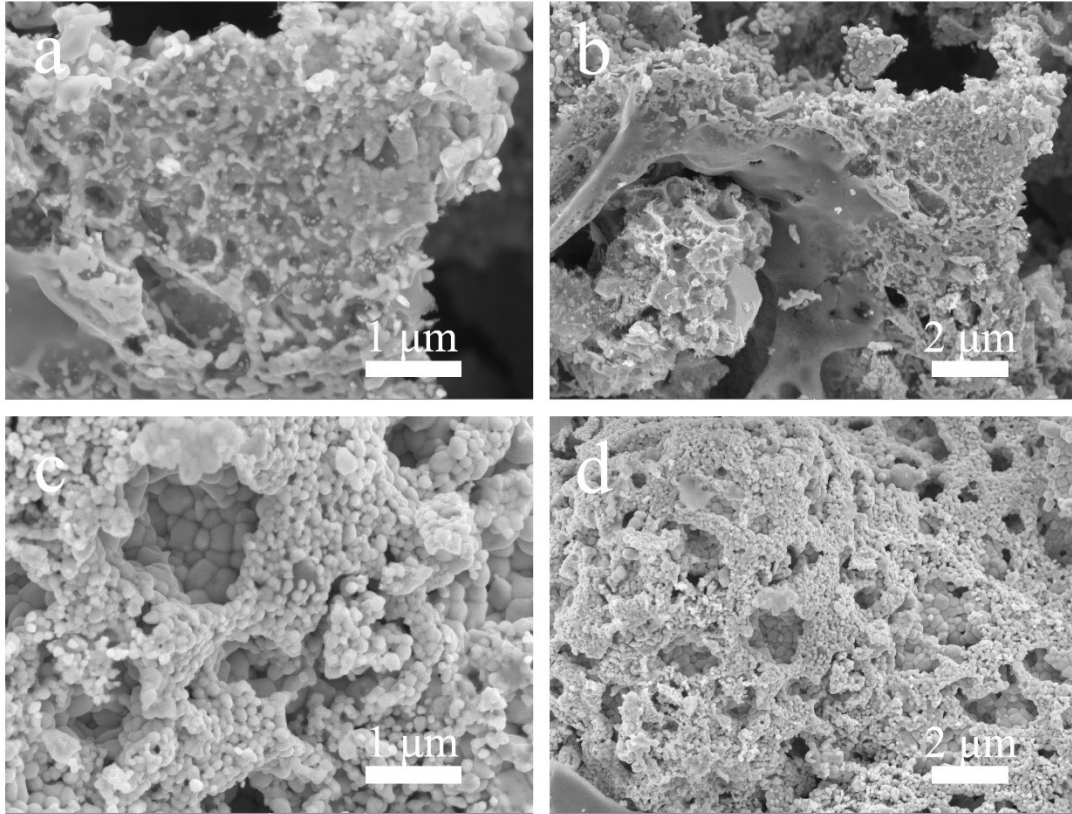

**Figure S3.** SEM images of samples with different time, a-b)  $\text{NiSe}_2/\text{N-C-10}$  and c-d)  $\text{NiSe}_2/\text{N-C-30}$ .

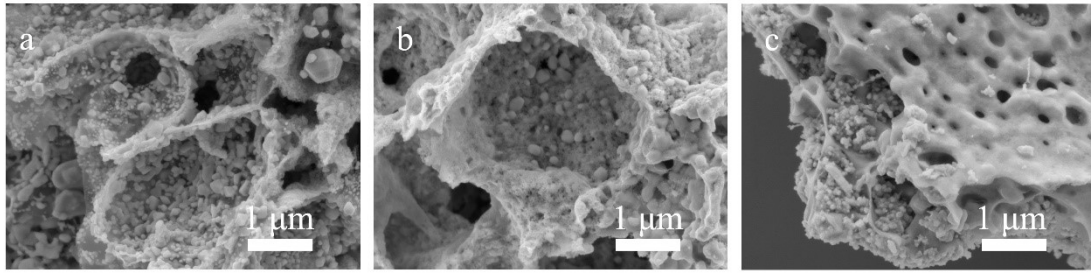

**Figure S4.** SEM images of samples with different mass ratios, a)  $\text{NiSe}_2/\text{Ni}_3\text{Se}_4/\text{N-C}$ , b)  $\text{Ni}_3\text{Se}_4/\text{NiSe}_2/\text{N-C}$  and c)  $\text{Ni}_3\text{Se}_4/\text{N-C}$ .

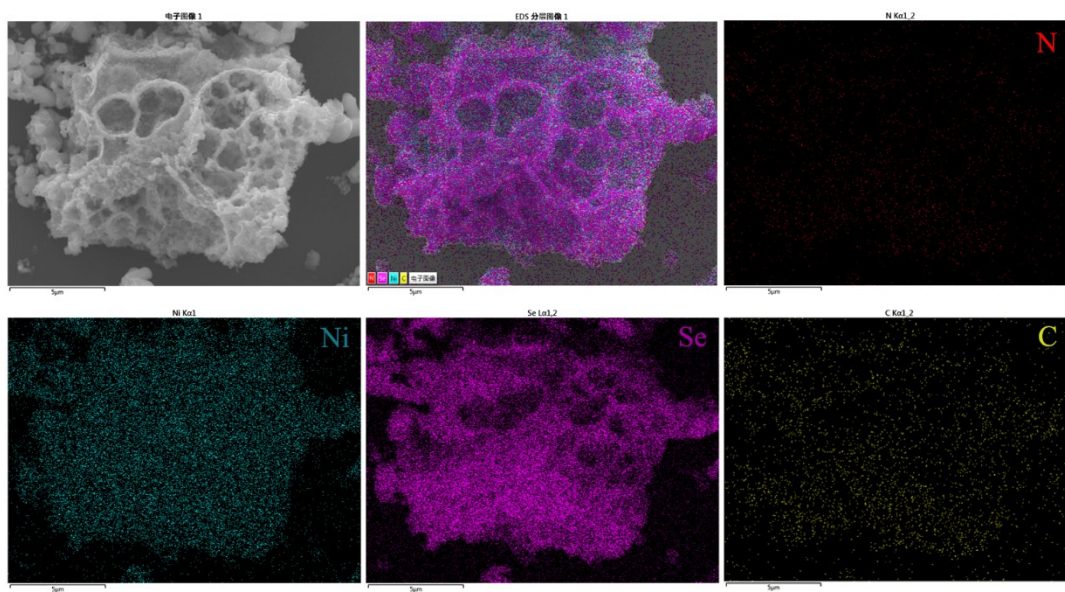

**Figure S5.** Elemental mapping images of NiSe<sub>2</sub>/N-C.

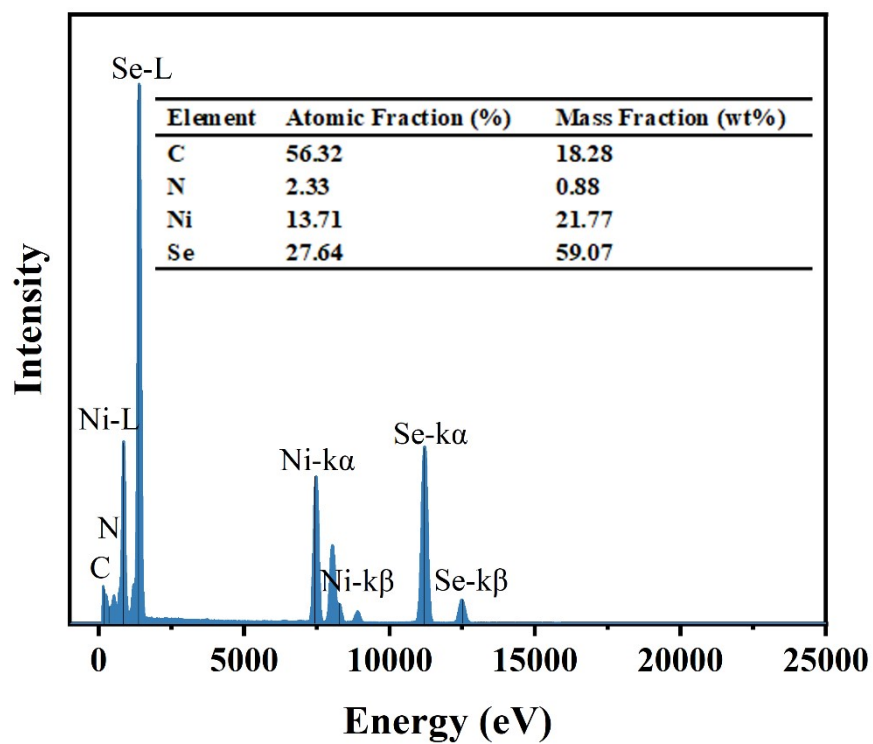

Figure S6. EDS of NiSe<sub>2</sub>/N-C.



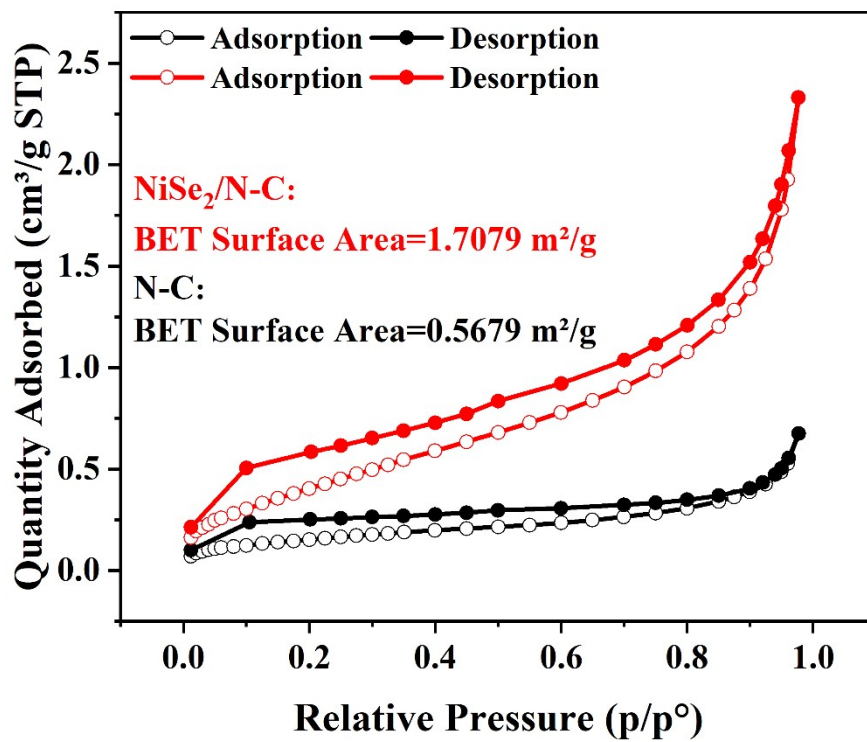

Figure S7. The N<sub>2</sub> adsorption-desorption isotherms.

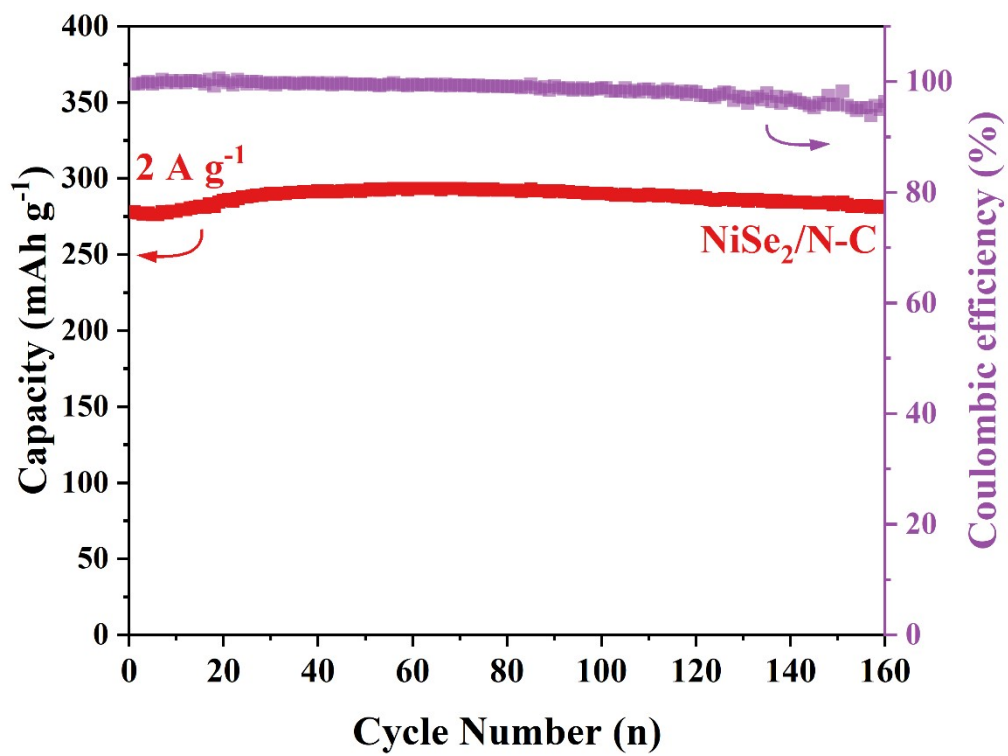

**Figure S8.** the cycling performance of NiSe<sub>2</sub>/N-C at 2 A g<sup>-1</sup>.

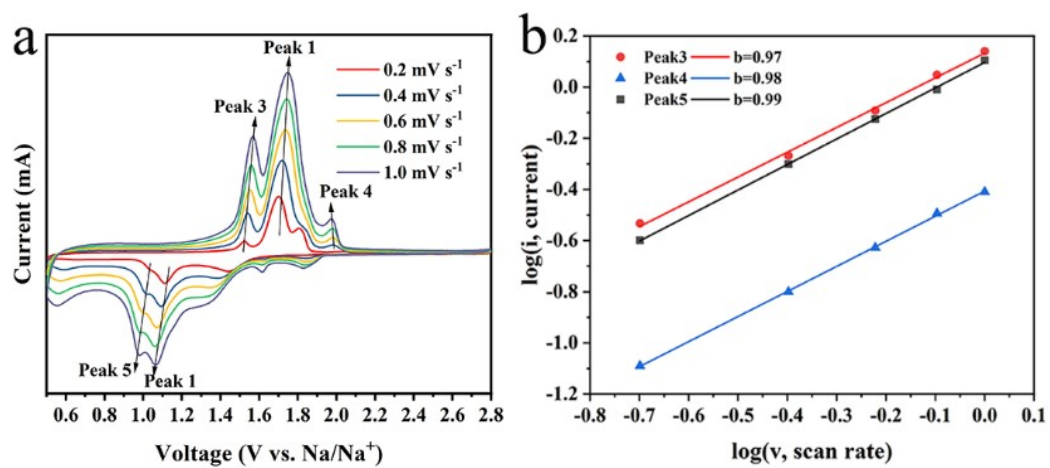

**Figure S9.** a) CV curves at different scan rates. b) The linear relationship of  $\log(v)$  and  $\log(i)$ .

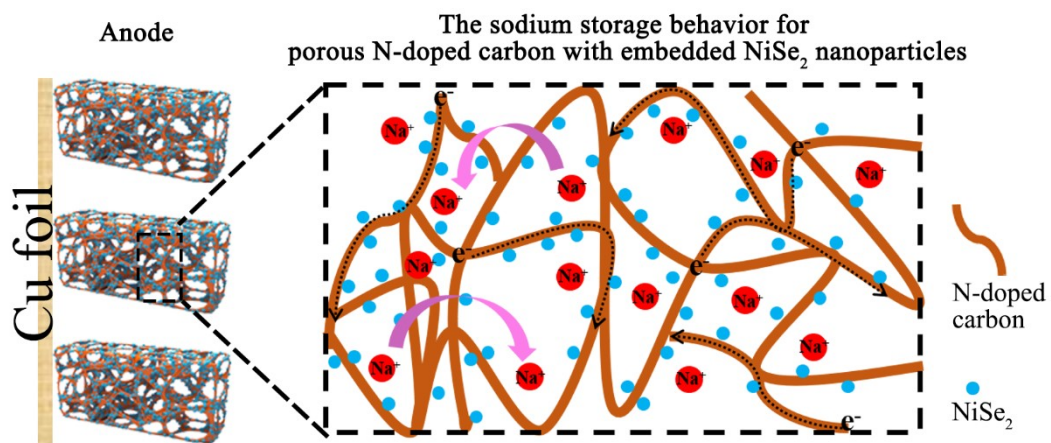

**Figure S10.** The mechanism of sodium storage behavior.

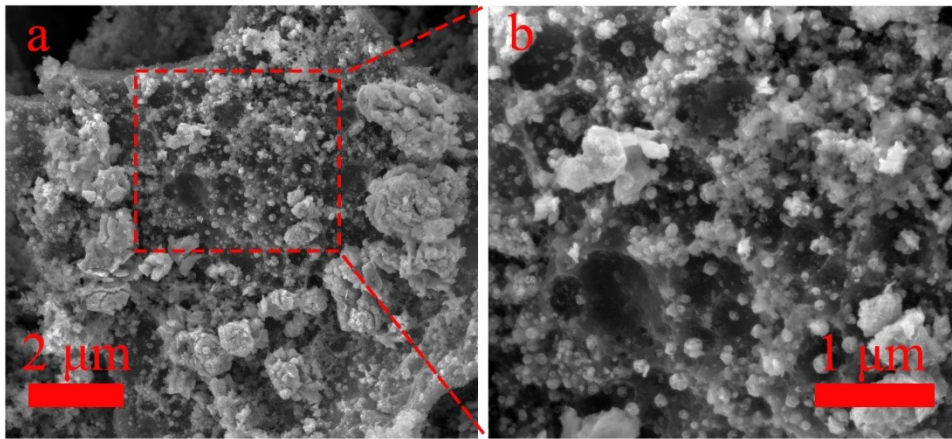

**Figure S11.** SEM images of the cycled NiSe<sub>2</sub>/N-C electrode.

**Table S1.**  $R_s$  ( $\Omega$ ),  $R_1$  ( $\Omega$ ),  $W$  ( $\Omega$ ) and  $R_2$  ( $\Omega$ ) of NiSe<sub>2</sub>/N-C electrode.

| Sample         | $R_s$ ( $\Omega$ ) | $R_1$ ( $\Omega$ ) | $W$ ( $\Omega$ ) | $R_2$ ( $\Omega$ ) |
|----------------|--------------------|--------------------|------------------|--------------------|
| 1st cycle      | 9.481              | 12.74              | 0.459            | -                  |
| 25th cycles    | 8.46               | 12.79              | 0.440            | -                  |
| 200th cycles   | 10.09              | 18.09              | 0.378            | -                  |
| Charge 0.8V    | 8.499              | 14.75              | 0.164            | -                  |
| Charge 2V      | 7.689              | 33.56              | 0.472            | -                  |
| Discharge 0.8V | 9.471              | 15.81              | 0.472            | 8.884              |
| Discharge 2V   | 8.93               | 18.69              | 0.428            | 11.66              |

**Table S2.** DFT calculation results of adsorption energies.

| Species           | $E_{\text{Na}}/\text{eV}$ | $E_{\text{anode}}/\text{eV}$ | $E_{\text{sodiated anode}}/\text{eV}$ | $E_{\text{adsorption energy}}/\text{eV}$ |
|-------------------|---------------------------|------------------------------|---------------------------------------|------------------------------------------|
| NiSe <sub>2</sub> | -1299.856444              | -164488.3032                 | -165789.0962                          | -0.936520295                             |
